# Supplementary material for: Humoral Responses Elicited after a Fifth Dose of SARS-CoV-2 mRNA Bivalent Vaccine
Source: MDPI journal article supplement (doi:10.3390/v15091926), 2023-09-15
Supplement: s1 [file s1]

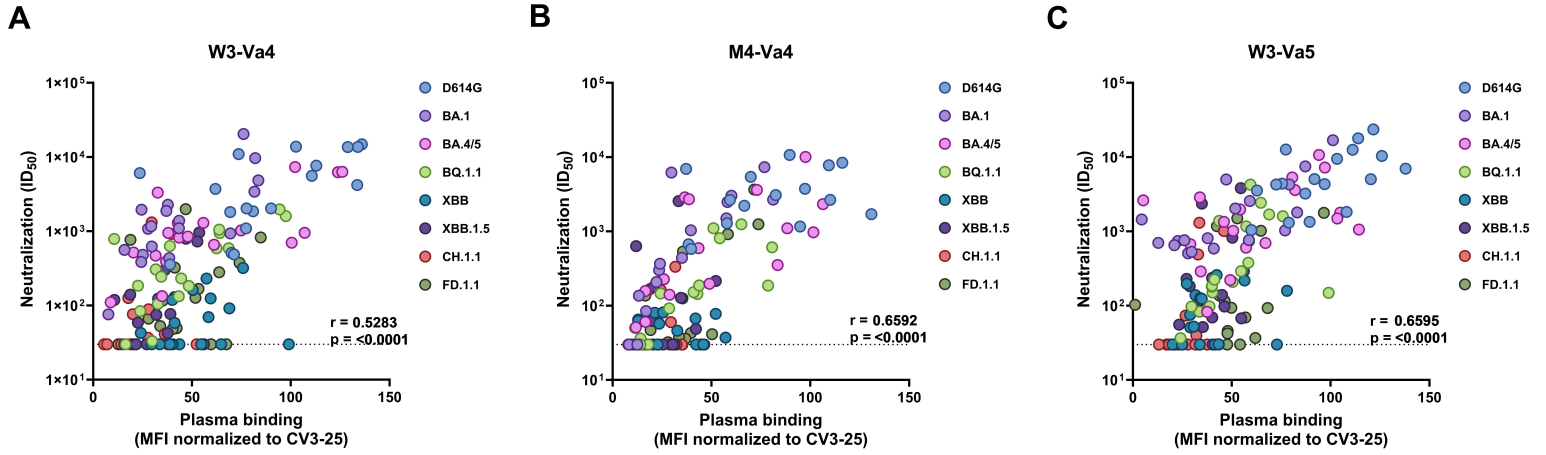

**Figure S1. Correlations between plasma binding and neutralization.** (A–C) The correlations between the capacity of plasma from vaccinated individuals collected at W3-Va4 (A), M4-Va4 (B) and W3-Va5 (C) to recognize Spike and the neutralization activity was calculated by nonparametric Spearman correlation.

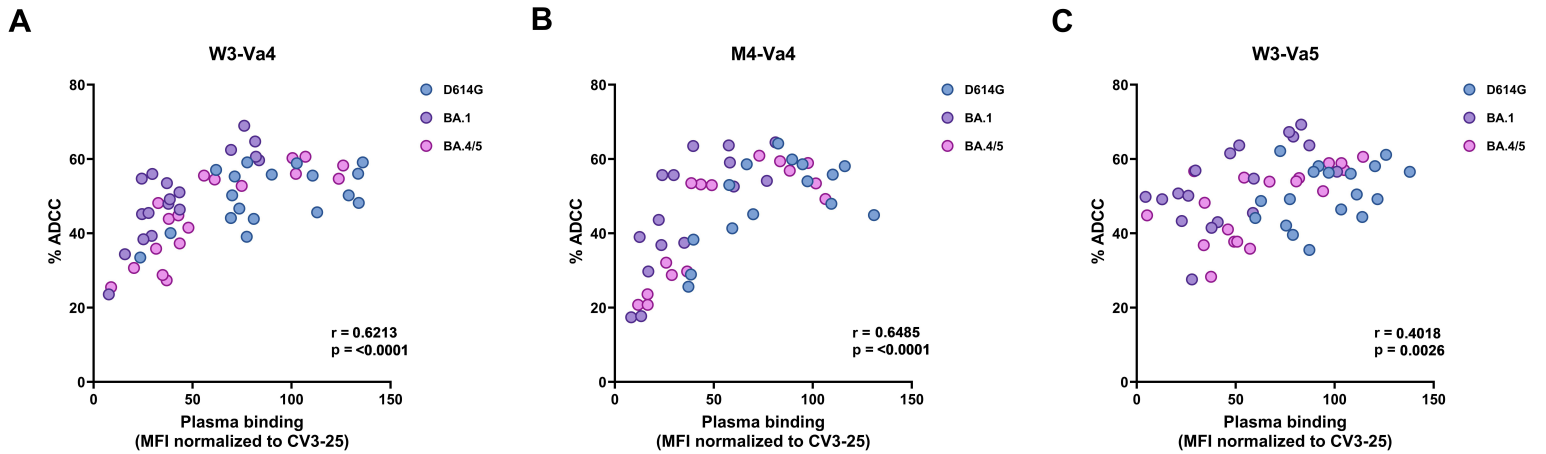

**Figure S2. Correlations between plasma binding and ADCC.** (A–C) The correlations between the capacity of plasma from vaccinated individuals collected at W3-Va4 (A), M4-Va4 (B) and W3-Va5 (C) to recognize Spike and the ADCC activity was calculated by Pearson correlation or nonparametric Spearman correlation.
